# Supplementary material for: Xihuang Pill Induces Apoptosis of Human Glioblastoma U-87 MG Cells via Targeting ROS-Mediated Akt/mTOR/FOXO1 Pathway
Source: Evid Based Complement Alternat Med. 2018 Jun 26;2018:6049498. doi: 10.1155/2018/6049498 (PMC6038446; doi:10.1155/2018/6049498)
Supplement: Supplementary 2 — Figure S1: The total ion chromatogram of XHP obtained from GC-MS analysis. [file 6049498.f2.docx]

**Table S1.** Compounds identified by GC-MS analysis

| **Peak No.** | **tR/min** | **Name** | **formula** | **Area%** |
| --- | --- | --- | --- | --- |
|  | 5.263 | 1-Octanol | C8H18O | 0.47 |
|  | 8.215 | Octyl acetate | C10H20O2 | 0.66 |
|  | 11.673 | β-Elemene | C15H24 | 0.20 |
|  | 14.323 | Lauric acid | C12H24O2 | 0.40 |
|  | 15.068 | Epicurzerenone | C15H18O2 | 1.06 |
|  | 15.446 | α-Copaene-8-ol | C15H24O | 0.70 |
|  | 15.613 | α-Cadinol | C15H26O | 0.22 |
|  | 17.075 | Procerin | C15H18O2 | 0.07 |
|  | 17.984 | Name: Isofuranodienone | C15H18O2 | 0.26 |
|  | 18.689 | Muscone | C16H30O | 0.57 |
|  | 19.072 | Citromycin | C13H10O5 | 0.49 |
|  | 19.109 | Unidentified |  | 0.38 |
|  | 19.473 | Myrrhanolide C | C15H18O4 | 0.43 |
|  | 19.765 | Methyl palmitate | C17H34O2 | 0.38 |
|  | 20.735 | Palmitic acid | C16H32O2 | 0.83 |
|  | 20.920 | Neocembrene A | C20H32 | 0.72 |
|  | 21.443 | 2-Heptyl-4-quinolinol 1-oxide | C16H21NO2 | 0.47 |
|  | 21.814 | 4-Acetyl-3-amino-5-ethyl-2-cyclopentene-1,1,2-tricarbonitrile | C12H12N4O | 0.43 |
|  | 22.317 | (S,E)-8,12,15,15-Tetramethyl-4-methylenebicyclo[9.3.1]pentadeca-7,11-diene | C20H32 | 2.84 |
|  | 23.208 | trans-5-Amino-5,6-dihydrochrysen-6-ol | C18H15NO | 0.65 |
|  | 27.044 | Isopropyl-1,5,9-trimethyl-15-oxabicyclo[10.2.1]pentadeca-5,9-dien-2-ol | C20H34O2 | 11.40 |
|  | 28.042 | 3,14,15-Trihydroxypregn-16-en-20-one | C21H32O4 | 11.77 |
|  | 32.707 | 4.Incensole oxide | C20H34O3 | 2.74 |
|  | 32.831 | Z-5-Methyl-6-heneicosen-11-one | C22H42O | 0.96 |
|  | 33.220 | 7,11-Dihydroxypregnane-3,20-dione | C21H32O4 | 2.47 |
|  | 33.797 | Unidentified |  | 0.60 |
|  | 34.851 | Spiro[7-acetoxy-2-hydroxy-2,4b-dimethylphenanthrene]-1,2'-(tetrahydropyran-5'-one) | C21H32O5 | 2.67 |
|  | 35.910 | Unidentified |  | 0.73 |
|  | 36.071 | Unidentified |  | 0.48 |
|  | 37.045 | Unidentified |  | 0.57 |
|  | 37.986 | 3-Ethyl-3-hydroxy-androstan-17-one | C21H34O2 | 0.94 |
|  | 38.049 | Unidentified |  | 0.72 |
|  | 38.440 | Unidentified |  | 1.21 |
|  | 38.772 | Lupeol | C30H50O | 1.09 |
|  | 47.399 | 3-(3,4-dimethylphenyl)-3-methyl-17-androstanone | C28H40O | 1.01 |
|  | 49.230 | 24-Norursa-3,9(11),12-triene | C29H44 | 5.98 |
|  | 49.809 | 24-Noroleana-3,12-diene | C29H46 | 8.45 |
|  | 51.543 | 24-Norursa-3,12-diene | C29H46 | 17.72 |
|  | 64.079 | 24-Norursa-3,12-dien-11-one | C29H44O | 16.28 |
